# Supplementary material
Source: Elsevier journal article supplement (https://rcastoragev2.blob.core.windows.net/74f581bddcf3bd1c8dee8246962ef8a8/mmc1.pdf)
Supplement: mmc1 [file mmc1.pdf]

### **Supplementary appendix**

This appendix formed part of the original submission and has been peer reviewed.  
We post it as supplied by the authors.

Supplement to: Ontaneda D, Tallantyre E, Kalincik T, Planchon SM, Evangelou N.  
Early highly effective versus escalation treatment approaches in relapsing multiple  
sclerosis. *Lancet Neurol* 2019; published online July 30. [http://dx.doi.org/10.1016/S1474-4422\(19\)30151-6](http://dx.doi.org/10.1016/S1474-4422(19)30151-6).

## SUPPLEMENTARY APPENDIX

This appendix has been provided by the authors to give additional information about their study.

Supplement to: Chataway J, De Angelis F, Connick P, et al. *Multiple Sclerosis-Secondary Progressive Multi-Arm Randomisation Trial (MS-SMART): a multi-arm phase 2B randomised, double-blind, placebo-controlled clinical trial comparing the efficacy of three neuroprotective drugs in secondary progressive multiple sclerosis.*

### Contents

|                                                                                                  |           |
|--------------------------------------------------------------------------------------------------|-----------|
| <i>Inclusion Criteria.....</i>                                                                   | <i>2</i>  |
| <i>Exclusion Criteria.....</i>                                                                   | <i>3</i>  |
| <i>Table S1: Sensitivity analyses and secondary analyses of Percentage Brain Volume Change.</i>  | <i>4</i>  |
| <i>Table S2: Summary statistics for the clinical secondary outcomes, split by trial arm.....</i> | <i>5</i>  |
| <i>Table S3: Secondary outcomes at 48 weeks, split by trial arm .....</i>                        | <i>11</i> |
| <i>Table S4: Concomitant medications .....</i>                                                   | <i>13</i> |
| <i>Table S5: Full table of adverse events occurring in the safety population .....</i>           | <i>14</i> |

## **Inclusion Criteria**

- Confirmed diagnosis of secondary progressive multiple sclerosis (SPMS). Steady progression rather than relapse must be the major cause of increasing disability in the preceding 2 years. Progression can be evident from either an increase of at least one point in the expanded disability status scale (EDSS) or clinical documentation of increasing disability in patients notes
- EDSS 4.0-6.5
- Aged 25 to 65 inclusive
- Women and men with partners of childbearing potential must be using an appropriate method of contraception to avoid any unlikely teratogenic effects of the 3 drugs from time of consent, to 6 weeks after treatment inclusive
- Women must have a negative pregnancy test within 7 days prior to the baseline visit unless not of child bearing potential (e.g. have undergone a hysterectomy, bilateral tubal ligation or bilateral oophorectomy or they are postmenopausal)
- Willing and able to comply with the trial protocol (e.g. can tolerate magnetic resonance imaging [MRI] and fulfils the requirements for MRI, e.g. not fitted with pacemakers or permanent hearing aids) ability to understand and complete questionnaires
- Written informed consent

## **Exclusion Criteria**

- Pregnancy or breastfeeding females
- Baseline MRI scan not of adequate quality for analysis (e.g. too much movement artefact)
- Significant organ co-morbidity (e.g. malignancy or renal or hepatic failure)
- Relapse within 3 months of baseline visit
- Patients who have been treated with iv or oral steroids for an multiple sclerosis relapse/progression within 3 months of baseline visit (these patients can undergo future screening visits once the 3 month window has expired), patients on steroids for another medical condition may enter as long as the steroid prescription is not for multiple sclerosis (relapse/ progression).
- Use of Simvastatin at 80 mg dose within 3 months of baseline visit (lower doses of Simvastatin and other statins are permissible)
- Commencement of fampridine within 6 months of baseline visit

**Table S1: Sensitivity analyses and secondary analyses of Percentage Brain Volume Change**

| Analysis                                                                | N   | Amiloride-Placebo        |                                      |                          | Fluoxetine-Placebo       |                                      |                          | Riluzole- placebo        |                                      |                          |
|-------------------------------------------------------------------------|-----|--------------------------|--------------------------------------|--------------------------|--------------------------|--------------------------------------|--------------------------|--------------------------|--------------------------------------|--------------------------|
|                                                                         |     | Adjusted Mean difference | Simultaneous 95% Confidence Interval | Dunnett adjusted p-value | Adjusted Mean difference | Simultaneous 95% Confidence Interval | Dunnett adjusted p-value | Adjusted Mean difference | Simultaneous 95% Confidence Interval | Dunnett adjusted p-value |
| Sensitivity analysis 1: Multiple Imputation based on a MNAR assumption* | 445 | 0.064                    | -0.376 to 0.503                      | 0.776                    | -0.137                   | -0.575 to 0.302                      | 0.541                    | -0.120                   | -0.562 to 0.322                      | 0.594                    |
| Sensitivity analysis 2: Multiple Imputation based on a MAR assumption   | 445 | 0.039                    | -0.386 to 0.464                      | 0.858                    | -0.108                   | -0.528 to 0.311                      | 0.613                    | -0.129                   | -0.550 to 0.292                      | 0.549                    |
| Sensitivity analysis 3: with outliers removed                           | 392 | 0.041                    | -0.374 to 0.456                      | 0.991                    | -0.052                   | -0.472 to 0.368                      | 0.983                    | -0.139                   | -0.555 to 0.277                      | 0.770                    |
| Secondary analysis: using per protocol population                       | 263 | 0.122                    | -0.360 to 0.605                      | 0.883                    | -0.050                   | -0.539 to 0.439                      | 0.991                    | 0.097                    | -0.395 to 0.588                      | 0.940                    |
| Secondary analysis: PBVC at 24 weeks                                    | 404 | -0.006                   | -0.297 to 0.285                      | 1.000                    | -0.308                   | -0.596 to -0.020                     | <b>0.032</b>             | -0.179                   | -0.473 to 0.115                      | 0.342                    |
| Secondary analysis: PBVC between 24 and 96 weeks                        | 360 | 0.083                    | -0.336 to 0.501                      | 0.938                    | 0.221                    | -0.199 to 0.641                      | 0.461                    | 0.150                    | -0.269 to 0.569                      | 0.733                    |

The multiple regression model for each outcome included trial arm as an explanatory factor variable (with placebo as the reference category), baseline normalised brain volume, and the minimisation variables: age, gender, treatment centre and EDSS at randomisation. This was the same model as used for the primary analysis of the primary outcome. EDSS: expanded disability status scale, MAR: Missing-At-Random, MNAR: Missing-Not-At-Random, PBVC: Percentage Brain Volume Change.

**Table S2: Summary statistics for the clinical secondary outcomes, split by trial arm**

|                               |          |      | Allocated Treatment |            |          |         | Overall |
|-------------------------------|----------|------|---------------------|------------|----------|---------|---------|
|                               |          |      | Amiloride           | Fluoxetine | Riluzole | Placebo |         |
| EDSS, score                   | Baseline | N    | 111                 | 111        | 111      | 112     | 445     |
|                               |          | Mean | 5.878               | 5.901      | 5.838    | 5.871   | 5.872   |
|                               |          | SD   | 0.745               | 0.710      | 0.748    | 0.773   | 0.742   |
|                               | 48 weeks | N    | 103                 | 98         | 97       | 100     | 398     |
|                               |          | Mean | 6.005               | 5.985      | 6.036    | 5.905   | 5.982   |
|                               |          | SD   | 0.769               | 0.889      | 0.814    | 0.909   | 0.845   |
|                               | 96 weeks | N    | 100                 | 95         | 92       | 96      | 383     |
|                               |          | Mean | 6.030               | 5.932      | 5.962    | 5.953   | 5.970   |
|                               |          | SD   | 1.002               | 1.189      | 1.072    | 1.021   | 1.069   |
| MSFC, z-score                 | Baseline | N    | 111                 | 111        | 111      | 112     | 445     |
|                               |          | Mean | -0.191              | -0.016     | -0.092   | -0.003  | -0.075  |
|                               |          | SD   | 1.189               | 0.602      | 0.952    | 0.906   | 0.935   |
|                               | 48 weeks | N    | 103                 | 97         | 96       | 99      | 395     |
|                               |          | Mean | -0.211              | -0.249     | -0.328   | -0.213  | -0.249  |
|                               |          | SD   | 1.255               | 1.089      | 1.477    | 1.357   | 1.297   |
|                               | 96 weeks | N    | 100                 | 95         | 95       | 97      | 387     |
|                               |          | Mean | -0.548              | -0.528     | -0.473   | -0.409  | -0.490  |
|                               |          | SD   | 1.868               | 1.664      | 1.687    | 1.776   | 1.746   |
| PASAT, no. of correct answers | Baseline | N    | 111                 | 110        | 111      | 112     | 444     |
|                               |          | Mean | 39.018              | 36.600     | 36.910   | 41.464  | 38.509  |
|                               |          | SD   | 13.667              | 15.171     | 16.003   | 13.864  | 14.784  |
|                               | 48 weeks | N    | 103                 | 97         | 94       | 98      | 392     |
|                               |          | Mean | 38.049              | 36.361     | 39.936   | 41.459  | 38.936  |
|                               |          | SD   | 15.428              | 15.710     | 14.250   | 14.092  | 14.965  |
|                               | 96 weeks | N    | 99                  | 95         | 94       | 97      | 385     |
|                               |          | Mean | 41.061              | 36.779     | 38.394   | 41.907  | 39.566  |
|                               |          | SD   | 14.340              | 16.322     | 15.554   | 16.728  | 15.826  |
| T25FW, s                      | Baseline | N    | 111                 | 109        | 111      | 112     | 443     |
|                               |          | Mean | 25.136              | 15.699     | 19.836   | 18.633  | 19.842  |

|                                     |  | Allocated Treatment |           |            |          |         |
|-------------------------------------|--|---------------------|-----------|------------|----------|---------|
|                                     |  |                     | Amiloride | Fluoxetine | Riluzole | Placebo |
|                                     |  |                     | Overall   |            |          |         |
|                                     |  | SD                  | 38.843    | 12.381     | 28.459   | 28.530  |
|                                     |  | N                   | 100       | 96         | 96       | 99      |
| 48 weeks                            |  | Mean                | 25.510    | 23.639     | 31.248   | 26.498  |
|                                     |  | SD                  | 38.401    | 31.874     | 49.335   | 43.941  |
|                                     |  | N                   | 99        | 94         | 93       | 96      |
| 96 weeks                            |  | Mean                | 38.988    | 33.899     | 33.953   | 32.882  |
|                                     |  | SD                  | 56.050    | 50.680     | 52.529   | 52.372  |
| 9HPT, s <sup>-1</sup>               |  |                     |           |            |          |         |
| Baseline                            |  | N                   | 111       | 111        | 111      | 112     |
|                                     |  | Mean                | 0.034     | 0.034      | 0.034    | 0.033   |
|                                     |  | SD                  | 0.011     | 0.010      | 0.010    | 0.010   |
| 48 weeks                            |  | N                   | 103       | 97         | 96       | 99      |
|                                     |  | Mean                | 0.034     | 0.032      | 0.034    | 0.033   |
|                                     |  | SD                  | 0.012     | 0.010      | 0.010    | 0.011   |
| 96 weeks                            |  | N                   | 100       | 95         | 95       | 97      |
|                                     |  | Mean                | 0.033     | 0.033      | 0.034    | 0.033   |
|                                     |  | SD                  | 0.012     | 0.011      | 0.012    | 0.012   |
| SDMT, no. of correct answers        |  |                     |           |            |          |         |
| Baseline                            |  | N                   | 109       | 111        | 109      | 112     |
|                                     |  | Mean                | 43.908    | 44.153     | 44.514   | 44.107  |
|                                     |  | SD                  | 12.400    | 11.410     | 13.065   | 12.778  |
| 48 weeks                            |  | N                   | 101       | 97         | 95       | 99      |
|                                     |  | Mean                | 43.584    | 44.454     | 45.105   | 44.960  |
|                                     |  | SD                  | 14.505    | 12.177     | 13.075   | 13.093  |
| 96 weeks                            |  | N                   | 100       | 95         | 93       | 94      |
|                                     |  | Mean                | 42.960    | 44.779     | 44.892   | 46.096  |
|                                     |  | SD                  | 14.906    | 13.743     | 14.219   | 14.480  |
| HCVA (100%), no. of correct answers |  |                     |           |            |          |         |
| Baseline                            |  | N                   | 107       | 111        | 110      | 111     |
|                                     |  | Mean                | 50.075    | 50.838     | 48.473   | 50.378  |
|                                     |  | SD                  | 11.193    | 10.801     | 14.836   | 12.668  |
| 48 weeks                            |  | N                   | 99        | 96         | 95       | 98      |
|                                     |  | Mean                | 51.000    | 50.688     | 49.642   | 50.520  |
|                                     |  | SD                  | 9.876     | 10.805     | 14.730   | 11.875  |
| 96 weeks                            |  | N                   | 98        | 96         | 93       | 95      |
|                                     |  | Mean                | 50.082    | 50.490     | 47.806   | 49.095  |

|                                       |      | Allocated Treatment |           |            |          |         |
|---------------------------------------|------|---------------------|-----------|------------|----------|---------|
|                                       |      |                     | Amiloride | Fluoxetine | Riluzole | Placebo |
|                                       |      | SD                  | 10.914    | 11.161     | 15.812   | 13.696  |
| Overall                               |      |                     |           |            |          |         |
| 13.004                                |      |                     |           |            |          |         |
| SLCVA (5%), no. of correct answers    |      |                     |           |            |          |         |
| Baseline                              | N    | 107                 | 110       | 108        | 110      | 435     |
|                                       | Mean | 32.579              | 32.927    | 29.963     | 33.927   | 32.359  |
|                                       | SD   | 13.401              | 12.820    | 16.131     | 14.575   | 14.311  |
| 48 weeks                              | N    | 98                  | 96        | 95         | 97       | 386     |
|                                       | Mean | 31.480              | 30.427    | 32.747     | 32.258   | 31.725  |
|                                       | SD   | 13.699              | 12.096    | 14.824     | 14.264   | 13.731  |
| 96 weeks                              | N    | 98                  | 95        | 93         | 94       | 380     |
|                                       | Mean | 31.827              | 32.611    | 31.151     | 32.415   | 32.003  |
|                                       | SD   | 12.906              | 13.072    | 15.650     | 13.470   | 13.759  |
| SLCVA (2.5%), no. of correct answers  |      |                     |           |            |          |         |
| Baseline                              | N    | 107                 | 111       | 109        | 111      | 438     |
|                                       | Mean | 19.103              | 17.649    | 18.807     | 20.847   | 19.103  |
|                                       | SD   | 12.709              | 12.356    | 14.164     | 13.978   | 13.331  |
| 48 weeks                              | N    | 98                  | 96        | 95         | 98       | 387     |
|                                       | Mean | 18.204              | 14.458    | 20.168     | 18.755   | 17.897  |
|                                       | SD   | 13.376              | 12.115    | 14.435     | 13.656   | 13.532  |
| 96 weeks                              | N    | 98                  | 96        | 93         | 95       | 382     |
|                                       | Mean | 17.133              | 16.521    | 17.656     | 18.084   | 17.343  |
|                                       | SD   | 14.209              | 13.160    | 14.228     | 13.378   | 13.710  |
| SLCVA (1.25%), no. of correct answers |      |                     |           |            |          |         |
| Baseline                              | N    | 107                 | 111       | 109        | 111      | 438     |
|                                       | Mean | 8.168               | 6.937     | 7.083      | 9.865    | 8.016   |
|                                       | SD   | 10.670              | 9.592     | 10.657     | 11.878   | 10.759  |
| 48 weeks                              | N    | 98                  | 96        | 94         | 98       | 386     |
|                                       | Mean | 7.000               | 4.833     | 7.660      | 8.398    | 6.977   |
|                                       | SD   | 10.045              | 8.347     | 11.074     | 10.845   | 10.181  |
| 96 weeks                              | N    | 98                  | 96        | 93         | 95       | 382     |
|                                       | Mean | 5.184               | 4.042     | 6.065      | 6.779    | 5.508   |
|                                       | SD   | 8.836               | 8.173     | 10.351     | 9.725    | 9.316   |
| MSISv2 Total, score                   |      |                     |           |            |          |         |
| Baseline                              | N    | 111                 | 111       | 111        | 112      | 445     |
|                                       | Mean | 63.915              | 65.000    | 69.154     | 66.072   | 66.036  |
|                                       | SD   | 13.374              | 13.828    | 15.011     | 14.389   | 14.251  |
|                                       | N    | 104                 | 95        | 98         | 102      | 399     |



|                     |                             |          | Allocated Treatment |            |          |         |         |        |
|---------------------|-----------------------------|----------|---------------------|------------|----------|---------|---------|--------|
|                     |                             |          | Amiloride           | Fluoxetine | Riluzole | Placebo | Overall |        |
|                     | 48 weeks                    | Mean     | 68.630              | 66.232     | 71.677   | 69.357  | 68.993  |        |
|                     |                             | SD       | 15.935              | 14.817     | 14.873   | 15.749  | 15.430  |        |
|                     | 96 weeks                    | N        | 101                 | 96         | 96       | 97      | 390     |        |
|                     |                             | Mean     | 72.332              | 69.749     | 72.902   | 69.533  | 71.140  |        |
|                     |                             | SD       | 16.335              | 15.117     | 15.799   | 17.173  | 16.137  |        |
|                     | MSISv2 Psychological, score |          |                     |            |          |         |         |        |
|                     | Baseline                    | N        | 111                 | 111        | 111      | 112     | 445     |        |
|                     |                             | Mean     | 15.947              | 16.657     | 18.163   | 17.103  | 16.968  |        |
|                     |                             | SD       | 4.511               | 4.759      | 5.427    | 4.977   | 4.979   |        |
|                     | 48 weeks                    | N        | 104                 | 95         | 98       | 102     | 399     |        |
|                     |                             | Mean     | 17.721              | 16.737     | 19.158   | 18.444  | 18.024  |        |
|                     |                             | SD       | 5.620               | 5.213      | 5.255    | 5.352   | 5.420   |        |
|                     | 96 weeks                    | N        | 101                 | 96         | 96       | 97      | 390     |        |
|                     |                             | Mean     | 19.108              | 17.676     | 19.333   | 18.256  | 18.599  |        |
|                     |                             | SD       | 6.063               | 5.257      | 5.352    | 5.799   | 5.651   |        |
|                     | MSISv2 Physical, score      |          |                     |            |          |         |         |        |
|                     |                             | Baseline | N                   | 111        | 111      | 111     | 112     | 445    |
|                     |                             |          | Mean                | 47.968     | 48.344   | 50.991  | 48.969  | 49.068 |
| SD                  |                             |          | 10.498              | 10.439     | 11.300   | 11.224  | 10.899  |        |
| 48 weeks            |                             | N        | 104                 | 96         | 98       | 102     | 400     |        |
|                     |                             | Mean     | 50.909              | 49.517     | 52.519   | 50.914  | 50.971  |        |
|                     |                             | SD       | 12.060              | 10.908     | 10.961   | 11.785  | 11.460  |        |
| 96 weeks            |                             | N        | 101                 | 97         | 96       | 98      | 392     |        |
|                     |                             | Mean     | 53.225              | 52.052     | 53.569   | 51.273  | 52.531  |        |
|                     |                             | SD       | 12.023              | 11.399     | 12.411   | 12.700  | 12.131  |        |
| MSWSv2 Total, score |                             |          |                     |            |          |         |         |        |
|                     |                             | Baseline | N                   | 111        | 111      | 110     | 112     | 444    |
|                     |                             |          | Mean                | 41.428     | 41.078   | 42.641  | 41.633  | 41.693 |
|                     | SD                          |          | 9.182               | 9.773      | 9.319    | 9.935   | 9.544   |        |
|                     | 48 weeks                    | N        | 104                 | 95         | 98       | 102     | 399     |        |
|                     |                             | Mean     | 42.664              | 42.263     | 44.738   | 43.372  | 43.259  |        |
|                     |                             | SD       | 10.122              | 9.352      | 8.053    | 9.919   | 9.424   |        |
|                     | 96 weeks                    | N        | 102                 | 96         | 96       | 96      | 390     |        |
|                     |                             | Mean     | 44.188              | 44.363     | 44.583   | 43.646  | 44.195  |        |
|                     |                             | SD       | 9.445               | 8.804      | 9.620    | 10.134  | 9.481   |        |
|                     | NFI Summary Interval, score |          |                     | 111        | 110      | 109     | 108     | 438    |

|                               |          | Allocated Treatment |            |          |         | Overall |
|-------------------------------|----------|---------------------|------------|----------|---------|---------|
|                               |          | Amiloride           | Fluoxetine | Riluzole | Placebo |         |
|                               | Baseline | N                   |            |          |         |         |
|                               |          | Mean                | 18.013     | 17.430   | 19.052  | 18.074  |
|                               |          | SD                  | 4.198      | 3.890    | 4.799   | 4.232   |
|                               | 48       | N                   | 104        | 93       | 98      | 396     |
|                               | weeks    | Mean                | 18.474     | 17.874   | 19.420  | 18.498  |
|                               |          | SD                  | 5.250      | 3.693    | 4.453   | 4.486   |
|                               | 96       | N                   | 100        | 97       | 96      | 391     |
|                               | weeks    | Mean                | 19.384     | 18.326   | 19.708  | 18.938  |
|                               |          | SD                  | 5.275      | 3.988    | 4.828   | 4.942   |
| NFI Physical Interval, score  |          |                     |            |          |         |         |
|                               | Baseline | N                   | 111        | 111      | 109     | 441     |
|                               |          | Mean                | 15.116     | 14.663   | 15.907  | 15.104  |
|                               |          | SD                  | 3.780      | 3.869    | 4.339   | 3.935   |
|                               | 48       | N                   | 104        | 94       | 98      | 397     |
|                               | weeks    | Mean                | 15.340     | 14.939   | 16.238  | 15.458  |
|                               |          | SD                  | 4.582      | 3.365    | 3.799   | 3.986   |
|                               | 96       | N                   | 101        | 97       | 96      | 392     |
|                               | weeks    | Mean                | 16.323     | 15.424   | 16.381  | 15.782  |
|                               |          | SD                  | 4.535      | 3.801    | 4.213   | 4.392   |
| NFI Cognitive Interval, score |          |                     |            |          |         |         |
|                               | Baseline | N                   | 111        | 110      | 109     | 439     |
|                               |          | Mean                | 6.517      | 6.215    | 7.065   | 6.525   |
|                               |          | SD                  | 2.207      | 2.243    | 2.331   | 2.307   |
|                               | 48       | N                   | 104        | 93       | 98      | 396     |
|                               | weeks    | Mean                | 6.905      | 6.583    | 7.076   | 6.796   |
|                               |          | SD                  | 2.523      | 2.070    | 2.163   | 2.334   |
|                               | 96       | N                   | 101        | 97       | 96      | 392     |
|                               | weeks    | Mean                | 7.094      | 6.768    | 7.410   | 7.007   |
|                               |          | SD                  | 2.544      | 2.059    | 2.092   | 2.889   |
| NFI Diurnal Interval, score   |          |                     |            |          |         |         |
|                               | Baseline | N                   | 111        | 111      | 110     | 442     |
|                               |          | Mean                | 10.068     | 9.611    | 10.244  | 9.900   |
|                               |          | SD                  | 2.780      | 2.932    | 3.104   | 2.841   |
|                               | 48       | N                   | 102        | 93       | 97      | 393     |
|                               | weeks    | Mean                | 10.012     | 10.299   | 10.214  | 10.214  |
|                               |          | SD                  | 2.764      | 2.447    | 2.479   | 2.537   |

|                               |          |      | Allocated Treatment |            |          |         |         |
|-------------------------------|----------|------|---------------------|------------|----------|---------|---------|
|                               |          |      | Amiloride           | Fluoxetine | Riluzole | Placebo | Overall |
|                               | 96 weeks | N    | 98                  | 96         | 96       | 96      | 386     |
|                               |          | Mean | 10.664              | 10.272     | 10.686   | 10.609  | 10.558  |
|                               |          | SD   | 3.240               | 2.851      | 2.475    | 2.582   | 2.799   |
| NFI Nocturnal Interval, score |          |      |                     |            |          |         |         |
|                               | Baseline | N    | 111                 | 111        | 111      | 111     | 444     |
|                               |          | Mean | 7.748               | 7.599      | 8.243    | 7.961   | 7.888   |
|                               |          | SD   | 2.037               | 2.463      | 2.782    | 2.294   | 2.413   |
|                               | 48 weeks | N    | 104                 | 94         | 98       | 102     | 398     |
|                               |          | Mean | 8.109               | 8.077      | 8.374    | 8.166   | 8.181   |
|                               |          | SD   | 2.180               | 2.213      | 2.633    | 2.296   | 2.330   |
|                               | 96 weeks | N    | 100                 | 97         | 96       | 97      | 390     |
|                               |          | Mean | 8.690               | 8.347      | 8.413    | 8.171   | 8.407   |
|                               |          | SD   | 2.133               | 2.252      | 2.471    | 2.202   | 2.265   |
| EQ-5D-5L index, score         |          |      |                     |            |          |         |         |
|                               | Baseline | N    | 111                 | 111        | 110      | 111     | 443     |
|                               |          | Mean | 0.683               | 0.702      | 0.658    | 0.671   | 0.678   |
|                               |          | SD   | 0.170               | 0.156      | 0.175    | 0.185   | 0.172   |
|                               | 48 weeks | N    | 103                 | 94         | 98       | 102     | 397     |
|                               |          | Mean | 0.648               | 0.658      | 0.617    | 0.645   | 0.642   |
|                               |          | SD   | 0.192               | 0.174      | 0.207    | 0.186   | 0.190   |
|                               | 96 weeks | N    | 102                 | 96         | 96       | 98      | 392     |
|                               |          | Mean | 0.603               | 0.615      | 0.596    | 0.613   | 0.607   |
|                               |          | SD   | 0.227               | 0.206      | 0.190    | 0.221   | 0.211   |
| EQ5D VAS: Health State, score |          |      |                     |            |          |         |         |
|                               | Baseline | N    | 111                 | 111        | 111      | 112     | 445     |
|                               |          | Mean | 66.126              | 67.523     | 61.730   | 65.241  | 65.155  |
|                               |          | SD   | 16.901              | 19.478     | 21.009   | 20.335  | 19.547  |
|                               | 48 weeks | N    | 103                 | 93         | 97       | 102     | 395     |
|                               |          | Mean | 63.563              | 66.140     | 58.608   | 62.961  | 62.797  |
|                               |          | SD   | 21.224              | 18.584     | 20.666   | 22.427  | 20.913  |
|                               | 96 weeks | N    | 102                 | 97         | 96       | 96      | 391     |
|                               |          | Mean | 61.765              | 61.938     | 59.625   | 64.281  | 61.900  |
|                               |          | SD   | 20.557              | 20.698     | 21.547   | 21.745  | 21.115  |

EDSS, Expanded Disability Status Scale; EQ-5D-5L, EuroQol-5 dimension; HCVA, high contrast visual acuity; MSFC, Multiple Sclerosis Functional Composite score; MSISv2, Multiple Sclerosis Impact Scale 29 version 2; MSWSv2, Multiple Sclerosis Walking Scale v2; NFI, Neurological Fatigue Index; SDMT, Symbol Digit Modalities Test; SLCVA, Sloan Low Contrast Visual Acuity; T25FW Timed 25 Foot Walk; 9HPT, 9 Hole Peg Test.

**Table S3: Secondary outcomes at 48 weeks, split by trial arm**

|                                     | <b>Amiloride</b><br>N=104 | <b>Fluoxetine</b><br>N=98 | <b>Riluzole</b><br>N=98 | <b>Placebo</b><br>N=102 | <b>Adjusted mean<br/>difference<br/>(Amiloride – Placebo)<br/>with 95% CI</b> | <b>P-value</b> | <b>Adjusted mean<br/>difference<br/>(Fluoxetine – Placebo)<br/>with 95% CI</b> | <b>P-value</b> | <b>Adjusted mean<br/>difference<br/>(Riluzole – Placebo)<br/>with 95% CI</b> | <b>P-value</b> |
|-------------------------------------|---------------------------|---------------------------|-------------------------|-------------------------|-------------------------------------------------------------------------------|----------------|--------------------------------------------------------------------------------|----------------|------------------------------------------------------------------------------|----------------|
| EDSS*, score                        | 6.0 (0.8)                 | 6.0 (0.9)                 | 6.0 (0.8)               | 5.9 (0.9)               | 0.1 (0.0 to 0.3)                                                              | 0.042          | 0.1 (-0.1 to 0.2)                                                              | 0.406          | 0.2 (0.1 to 0.3)                                                             | 0.007          |
| MSFC**, z-score                     | -0.2 (1.3)                | -0.2 (1.1)                | -0.3 (1.5)              | -0.2 (1.4)              | 0.06 (-0.11 to 0.24)                                                          | 0.488          | -0.09 (-0.27 to 0.09)                                                          | 0.308          | 0.01 (-0.17 to 0.19)                                                         | 0.913          |
| PASAT, no. of correct answers       | 38.0 (15.4)               | 36.4 (15.7)               | 39.9 (14.3)             | 41.5 (14.1)             | -0.7 (-3.1 to 1.7)                                                            | 0.577          | -0.6 (-3.1 to 1.8)                                                             | 0.616          | 2.1 (-0.4 to 4.5)                                                            | 0.106          |
| 9HPT, s <sup>-1</sup>               | 0.03 (0.01)               | 0.03 (0.01)               | 0.03 (0.01)             | 0.03 (0.01)             | 0.00 (-0.001 to 0.001)                                                        | 0.999          | -0.001 (-0.002 to 0.001)                                                       | 0.242          | 0.00 (-0.001 to 0.002)                                                       | 0.544          |
| SDMT, no. of correct answers        | 43.6 (14.5)               | 44.5 (12.2)               | 45.1 (13.1)             | 45.0 (13.1)             | -0.6 (-2.4 to 1.3)                                                            | 0.541          | -1.0 (-2.9 to 0.9)                                                             | 0.290          | -0.3 (-2.2 to 1.6)                                                           | 0.774          |
| HCVA 100%, no. of correct answers   | 51.0 (9.9)                | 50.7 (10.8)               | 49.6 (14.7)             | 50.5 (11.9)             | 0.7 (-1.5 to 3.0)                                                             | 0.538          | -0.3 (-2.6 to 2.0)                                                             | 0.799          | 1.1 (-1.2 to 3.3)                                                            | 0.363          |
| SLCVA 5%, no. of correct answers    | 31.5 (13.7)               | 30.4 (12.1)               | 32.7 (14.8)             | 32.3 (14.3)             | -0.6 (-3.2 to 2.0)                                                            | 0.656          | -1.3 (-4.0 to 1.3)                                                             | 0.317          | 2.6 (-0.1 to 5.3)                                                            | 0.056          |
| SLCVA 2-5%, no. of correct answers  | 18.2 (13.4)               | 14.5 (12.1)               | 20.2 (14.4)             | 18.8 (13.7)             | 0.6 (-1.9 to 3.1)                                                             | 0.643          | -1.8 (-4.3 to 0.7)                                                             | 0.154          | 2.5 (0.0 to 5.1)                                                             | 0.049          |
| SLCVA 1-25%, no. of correct answers | 7.0 (10.0)                | 4.8 (8.3)                 | 7.7 (11.1)              | 8.4 (10.8)              | -0.7 (-3.0 to 1.7)                                                            | 0.564          | -1.7 (-4.1 to -0.7)                                                            | 0.159          | 0.2 (-2.2 to 2.6)                                                            | 0.882          |
| MSIS-29v2 Total, score              | 68.6 (15.9)               | 66.2 (14.8)               | 71.7 (14.9)             | 69.4 (15.7)             | 0.4 (-2.8 to 3.6)                                                             | 0.795          | -2.2 (-5.5 to 1.1)                                                             | 0.183          | 0.5 (-2.7 to 3.8)                                                            | 0.747          |
| Physical, score                     | 50.9 (12.1)               | 49.5 (10.9)               | 52.5 (11.0)             | 50.9 (11.8)             | 0.5 (-1.8 to 2.8)                                                             | 0.695          | -1.0 (-3.4 to 1.3)                                                             | 0.398          | 0.5 (-1.8 to 2.9)                                                            | 0.660          |
| Psychological, score                | 17.7 (5.6)                | 16.7 (5.2)                | 19.2 (5.3)              | 18.4 (5.4)              | -0.1 (-1.3 to 1.1)                                                            | 0.874          | -1.3 (-2.5 to -0.0)                                                            | 0.045          | 0.1 (-1.1 to 1.3)                                                            | 0.894          |
| MSWSv2, score                       | 42.6 (10.1)               | 42.3 (9.4)                | 44.7 (8.1)              | 43.4 (9.9)              | -0.7 (-2.6 to 1.2)                                                            | 0.456          | -0.9 (-2.8 to 1.1)                                                             | 0.378          | 1.0 (-0.9 to 2.9)                                                            | 0.301          |
| NFI Summary, score                  | 18.5 (5.3)                | 17.9 (3.7)                | 19.4 (4.5)              | 18.2 (4.2)              | 0.2 (-0.8 to 1.2)                                                             | 0.707          | 0.3 (-0.7 to 1.3)                                                              | 0.558          | 0.6 (-0.4 to 1.6)                                                            | 0.266          |
| Physical, score                     | 15.3 (4.6)                | 14.9 (3.4)                | 16.2 (3.8)              | 15.3 (4.0)              | -0.0 (-1.0 to 0.9)                                                            | 0.934          | -0.1 (-1.0 to 0.9)                                                             | 0.917          | 0.5 (-0.4 to 1.5)                                                            | 0.292          |
| Cognitive, score                    | 6.9 (2.5)                 | 6.6 (2.1)                 | 7.1 (2.2)               | 6.6 (2.3)               | 0.1 (-0.3 to 0.6)                                                             | 0.584          | 0.2 (-0.2 to 0.7)                                                              | 0.333          | -0.1 (-0.5 to 0.4)                                                           | 0.809          |
| Diurnal, score                      | 10.0 (2.8)                | 10.3 (2.4)                | 10.2 (2.5)              | 10.3 (2.5)              | -0.6 (-1.1 to -0.1)                                                           | 0.032          | 0.0 (-0.5 to 0.6)                                                              | 0.957          | -0.4 (-1.0 to 0.1)                                                           | 0.137          |
| Nocturnal, score                    | 8.1 (2.2)                 | 8.1 (2.2)                 | 8.4 (2.6)               | 8.2 (2.3)               | 0.1 (-0.4 to 0.6)                                                             | 0.700          | 0.3 (-0.2 to 0.8)                                                              | 0.209          | 0.1 (-0.4 to 0.6)                                                            | 0.706          |
| EQ-5D-5L Index, score               | 0.6 (0.2)                 | 0.7 (0.2)                 | 0.6 (0.2)               | 0.6 (0.2)               | 0.00 (-0.04 to 0.05)                                                          | 0.874          | 0.00 (-0.04 to 0.05)                                                           | 0.916          | -0.02 (-0.06 to 0.03)                                                        | 0.482          |
| VAS, score                          | 63.6 (21.2)               | 66.1 (18.6)               | 58.6 (20.7)             | 63.0 (22.4)             | 0.7 (-4.5 to 5.9)                                                             | 0.796          | 2.6 (-2.7 to 8.0)                                                              | 0.329          | -2.7 (-8.0 to 2.6)                                                           | 0.315          |

The results for each outcome were derived from a single model analysing the N=402 participants in whom at least some 48 week outcome was recorded. N's shown are maximums per group. The minimum sample size was N=386 for each secondary outcome (minimum per group: Amiloride 98, Fluoxetine 93, Riluzole 94, Placebo 97). Data presented are mean (SD). The multiple regression model for each outcome included trial arm as an explanatory factor variable (with placebo as the reference category), the baseline measurement, and the minimisation variables: age, gender, treatment centre and EDSS at randomisation. Results from the Cox proportional hazards model used to analyse T25FW at 48 weeks showed no significant differences compared with placebo (hazard ratios 0.74 (0.55 to 1.00), p=0.052; 0.81 (95% CI 0.60 to 1.09), p=0.162; 0.78 (95% CI 0.58 to 1.05), p=0.100; for amiloride, fluoxetine, riluzole respectively). 9HPT: Nine Hole Peg Test, CI: confidence interval, EDSS: Expanded Disability Status Scale, MSFC: Multiple Sclerosis Functional Composite, MSIS-29v2: Multiple Sclerosis Impact Scale 29 items version 2, MSWSv2: Multiple Sclerosis Walking Scale version 2, NFI: Neurological Fatigue Index, PASAT: Paced Auditory Serial Addition Test, SDMT: Symbol Digit Modalities Test, SLCVA: Sloan Low Contrast Visual Acuity, T25FW: timed 25-foot walk; VAS: Visual Analogue Scale.

\*Confidence intervals calculated using 1000 bootstrap resamples.

\*\*MSFC was signed-square root transformed prior to analysis.

**Table S4: Concomitant medications**

|                                     | Allocated Treatment |       |            |       |          |       |         |       |         |       |
|-------------------------------------|---------------------|-------|------------|-------|----------|-------|---------|-------|---------|-------|
|                                     | Amiloride           |       | Fluoxetine |       | Riluzole |       | Placebo |       | Overall |       |
|                                     | N                   | %     | N          | %     | N        | %     | N       | %     | N       | %     |
| Total number of patients randomised | 111                 | 100.0 | 111        | 100.0 | 111      | 100.0 | 112     | 100.0 | 445     | 100.0 |
| Concomitant medications category:   |                     |       |            |       |          |       |         |       |         |       |
| Anti-depressants                    | 7                   | 6.3   | 5          | 4.5   | 14       | 12.6  | 10      | 8.9   | 36      | 8.1   |
| Anti-emetics                        | 1                   | 0.9   | 2          | 1.8   | 3        | 2.7   | 3       | 2.7   | 9       | 2.0   |
| Anti-fatigue medication             | 10                  | 9.0   | 12         | 10.8  | 9        | 8.1   | 3       | 2.7   | 34      | 7.6   |
| Anti-hypertensives                  | 15                  | 13.5  | 15         | 13.5  | 18       | 16.2  | 21      | 18.8  | 69      | 15.5  |
| Antibiotics                         | 36                  | 32.4  | 43         | 38.7  | 31       | 27.9  | 31      | 27.7  | 141     | 31.7  |
| Asthma agents                       | 6                   | 5.4   | 5          | 4.5   | 5        | 4.5   | 2       | 1.8   | 18      | 4.0   |
| Bisphosphonates                     | 2                   | 1.8   | 3          | 2.7   | 1        | 0.9   | 4       | 3.6   | 10      | 2.2   |
| Bladder agents                      | 39                  | 35.1  | 49         | 44.1  | 41       | 36.9  | 48      | 42.9  | 177     | 39.8  |
| Hormone Replacement Therapy (HRT)   | 8                   | 7.2   | 7          | 6.3   | 6        | 5.4   | 12      | 10.7  | 33      | 7.4   |
| Low dose naltrexone (LDN)           | 5                   | 4.5   | 6          | 5.4   | 3        | 2.7   | 2       | 1.8   | 16      | 3.6   |
| Neuropathic analgesia               | 44                  | 39.6  | 36         | 32.4  | 47       | 42.3  | 47      | 42.0  | 174     | 39.1  |
| Non-neuropathic analgesia           | 48                  | 43.2  | 51         | 45.9  | 47       | 42.3  | 51      | 45.5  | 197     | 44.3  |
| Other                               | 76                  | 68.5  | 79         | 71.2  | 92       | 82.9  | 82      | 73.2  | 329     | 73.9  |
| Proton pump inhibitors (PPIs)       | 15                  | 13.5  | 13         | 11.7  | 15       | 13.5  | 9       | 8.0   | 52      | 11.7  |
| Spasticity agents                   | 47                  | 42.3  | 40         | 36.0  | 46       | 41.4  | 38      | 33.9  | 171     | 38.4  |
| Statins                             | 18                  | 16.2  | 15         | 13.5  | 19       | 17.1  | 14      | 12.5  | 66      | 14.8  |
| Thyroxine                           | 6                   | 5.4   | 7          | 6.3   | 14       | 12.6  | 10      | 8.9   | 37      | 8.3   |
| Vitamin D supplements               | 52                  | 46.8  | 58         | 52.3  | 51       | 45.9  | 50      | 44.6  | 211     | 47.4  |

Number of patients taking at least one concomitant medication in each concomitant medications category throughout the duration of the study (from baseline to end of follow-up), split by trial arm and overall

**Table S5: Full table of adverse events occurring in the safety population**

|                                                 | Fluoxetine (N=111) | Riluzole (N=109) | Amiloride (N=111) | Placebo (N=112) |
|-------------------------------------------------|--------------------|------------------|-------------------|-----------------|
| Number of adverse events                        | 738                | 634              | 609               | 582             |
| Patients experiencing at least one AE           | 105 (95%)          | 101 (93%)        | 100 (90%)         | 103 (92%)       |
| Blood and lymphatic system disorders            | 3 (3%)             | 2 (2%)           | 5 (5%)            | 3 (3%)          |
| Cardiac disorders                               | 3 (3%)             | 8 (7%)           | 1 (1%)            | 2 (2%)          |
| Ear and labyrinth disorders                     | 3 (3%)             | 1 (1%)           | 5 (5%)            | 5 (4%)          |
| Endocrine disorders                             | 0 (0%)             | 1 (1%)           | 0 (0%)            | 0 (0%)          |
| Eye disorders                                   | 8 (7%)             | 9 (8%)           | 13 (12%)          | 8 (7%)          |
| Gastrointestinal disorders                      | 62 (56%)           | 49 (45%)         | 46 (41%)          | 36 (32%)        |
| General disorders and administration            | 28 (25%)           | 27 (25%)         | 26 (23%)          | 32 (29%)        |
| Hepatobiliary disorders                         | 3 (3%)             | 0 (0%)           | 2 (2%)            | 1 (1%)          |
| Immune system disorders                         | 1 (1%)             | 3 (3%)           | 1 (1%)            | 0 (0%)          |
| Infections and infestations                     | 58 (52%)           | 62 (57%)         | 68 (61%)          | 69 (62%)        |
| Injury, poisoning and procedural complications  | 43 (39%)           | 29 (27%)         | 26 (23%)          | 28 (25%)        |
| Investigations                                  | 20 (18%)           | 17 (16%)         | 10 (9%)           | 8 (7%)          |
| Metabolism and nutrition disorders              | 9 (8%)             | 7 (6%)           | 2 (2%)            | 4 (4%)          |
| Musculoskeletal and connective tissue disorders | 26 (23%)           | 37 (34%)         | 37 (33%)          | 29 (26%)        |
| Neoplasms benign, malignant and unspecified     | 1 (1%)             | 4 (4%)           | 2 (2%)            | 2 (2%)          |
| Nervous system disorders                        | 46 (41%)           | 47 (43%)         | 48 (43%)          | 44 (39%)        |
| Psychiatric disorders                           | 30 (27%)           | 22 (20%)         | 21 (19%)          | 22 (20%)        |
| Renal and urinary disorders                     | 13 (12%)           | 10 (9%)          | 9 (8%)            | 5 (4%)          |
| Reproductive system and breast disorders        | 3 (3%)             | 2 (2%)           | 4 (4%)            | 2 (2%)          |
| Respiratory disorders                           | 23 (21%)           | 13 (12%)         | 15 (14%)          | 16 (14%)        |
| Skin and subcutaneous tissue disorders          | 11 (10%)           | 13 (12%)         | 16 (14%)          | 17 (15%)        |
| Surgical and medical procedures                 | 3 (3%)             | 8 (7%)           | 6 (5%)            | 7 (6%)          |
| Vascular disorders                              | 2 (2%)             | 3 (3%)           | 4 (4%)            | 6 (5%)          |
| Patients experiencing at least one SAE          | 7 (6%)             | 12 (11%)         | 10 (9%)           | 13 (12%)        |
| Cardiac disorders                               | 1 (1%)             | 2 (2%)           | 0                 | 0               |
| Gastrointestinal disorders                      | 0                  | 0                | 1 (1%)            | 1 (1%)          |
| General disorders and administration            | 2 (2%)             | 1 (1%)           | 0                 | 1 (1%)          |
| Hepatobiliary disorders                         | 1 (1%)             | 0                | 1 (1%)            | 1 (1%)          |
| Infections and infestations                     | 1 (1%)             | 4 (4%)           | 4 (4%)            | 4 (4%)          |

|                                                 |        |        |        |        |
|-------------------------------------------------|--------|--------|--------|--------|
| Injury, poisoning and procedural complications  | 0      | 3 (3%) | 3 (3%) | 2 (2%) |
| Investigations                                  | 0      | 0      | 0      | 1 (1%) |
| Musculoskeletal and connective tissue disorders | 1 (1%) | 0      | 0      | 0      |
| Neoplasms benign, malignant and unspecified     | 0      | 0      | 1 (1%) | 0      |
| Nervous system disorders                        | 0      | 1 (1%) | 1 (1%) | 0      |
| Psychiatric disorders                           | 1 (1%) | 1 (1%) | 0      | 1 (1%) |
| Renal and urinary disorders                     | 1 (1%) | 0      | 1 (1%) | 0      |
| Respiratory disorders                           | 0      | 1 (1%) | 1 (1%) | 0      |
| Skin and subcutaneous tissue disorders          | 0      | 0      | 0      | 1 (1%) |
| Surgical and medical procedures                 | 0      | 1 (1%) | 1 (1%) | 1 (1%) |
| Vascular disorders                              | 0      | 0      | 0      | 1 (1%) |
| Patients experiencing at least one SUSAR        | 0 (0%) | 1 (1%) | 0 (0%) | 0 (0%) |

Data are number of patients experiencing each type of event. Two patients randomised to the Riluzole treatment arm were prescribed Fluoxetine by their GP during follow-up (these were protocol deviations). These two patients experienced a total of 5 adverse events and no serious adverse events. A few of the AEs for these patients occurred after Fluoxetine was prescribed and therefore, if adverse reactions, may be attributable to Fluoxetine rather than Riluzole (or a combination of the two). Progressive change due to SPMS, in motor, sensory, balance, sphincter (including urinary tract infections), vision, cognitive and fatigue levels were not reported as AEs/SAEs/SUSARs. In addition, relapses were not reported as AEs/SAEs/SUSARs, but are collated separately. AE: adverse event, SAE: serious adverse event; SUSAR: Suspected Unexpected Serious Adverse Reaction.
